# Supplementary material
Source: PubMed Central journal article supplement (PMC10408468)
Supplement: ajcr0013-3055-f6.pdf [file ajcr0013-3055-f6.pdf]

RP-619 inhibits chondrosarcoma

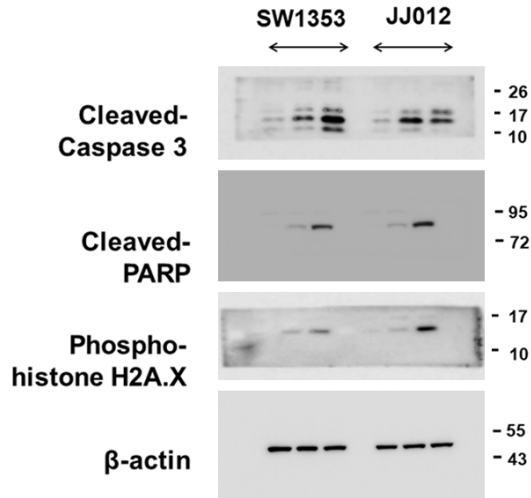

**Figure S1.** Full-length gels and blots corresponding to **Figure 1C**. Molecular weight (kDa) has been shown in the right panel.

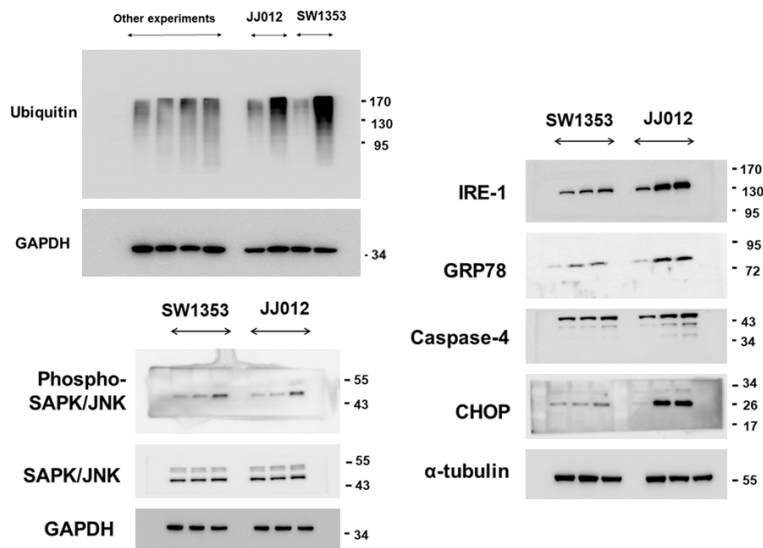

**Figure S2.** Full-length gels and blots corresponding to **Figure 3A-C**. Molecular weight (kDa) has been shown in the right panel.

## RP-619 inhibits chondrosarcoma

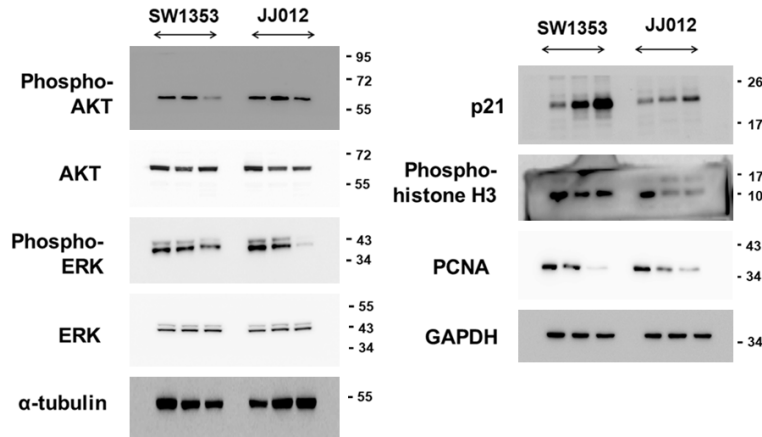

**Figure S3.** Full-length gels and blots corresponding to **Figure 4C**. Molecular weight (kDa) has been shown in the right panel.

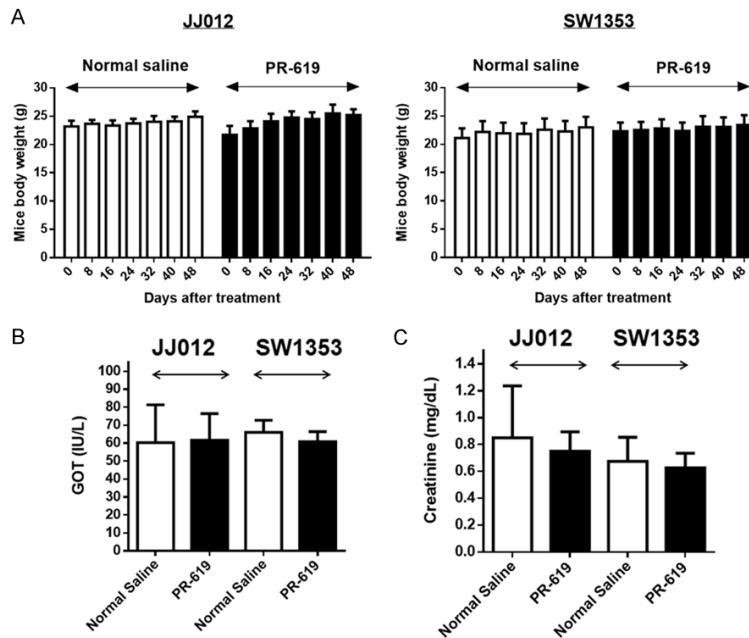

**Figure S4.** A. To evaluate the toxicity of PR-619 in mice, the study involved regular body weight measurements every 8 days throughout the duration of PR-619 treatment. B and C. Following the completion of the experiment, blood samples were collected, and serum was separated from the blood in order to assess the levels of GOT and creatinine.
